# Supplementary material for: A Cup of Hemp Coffee by Moka Pot from Southern Italy: An UHPLC-HRMS Investigation
Source: PubMed Central journal article supplement (PMC7466224; doi:10.3390/foods9081123), 2020-08-14
Supplement: foods-09-01123-s001.pdf [file foods-09-01123-s001.pdf]

## Supplementary materials

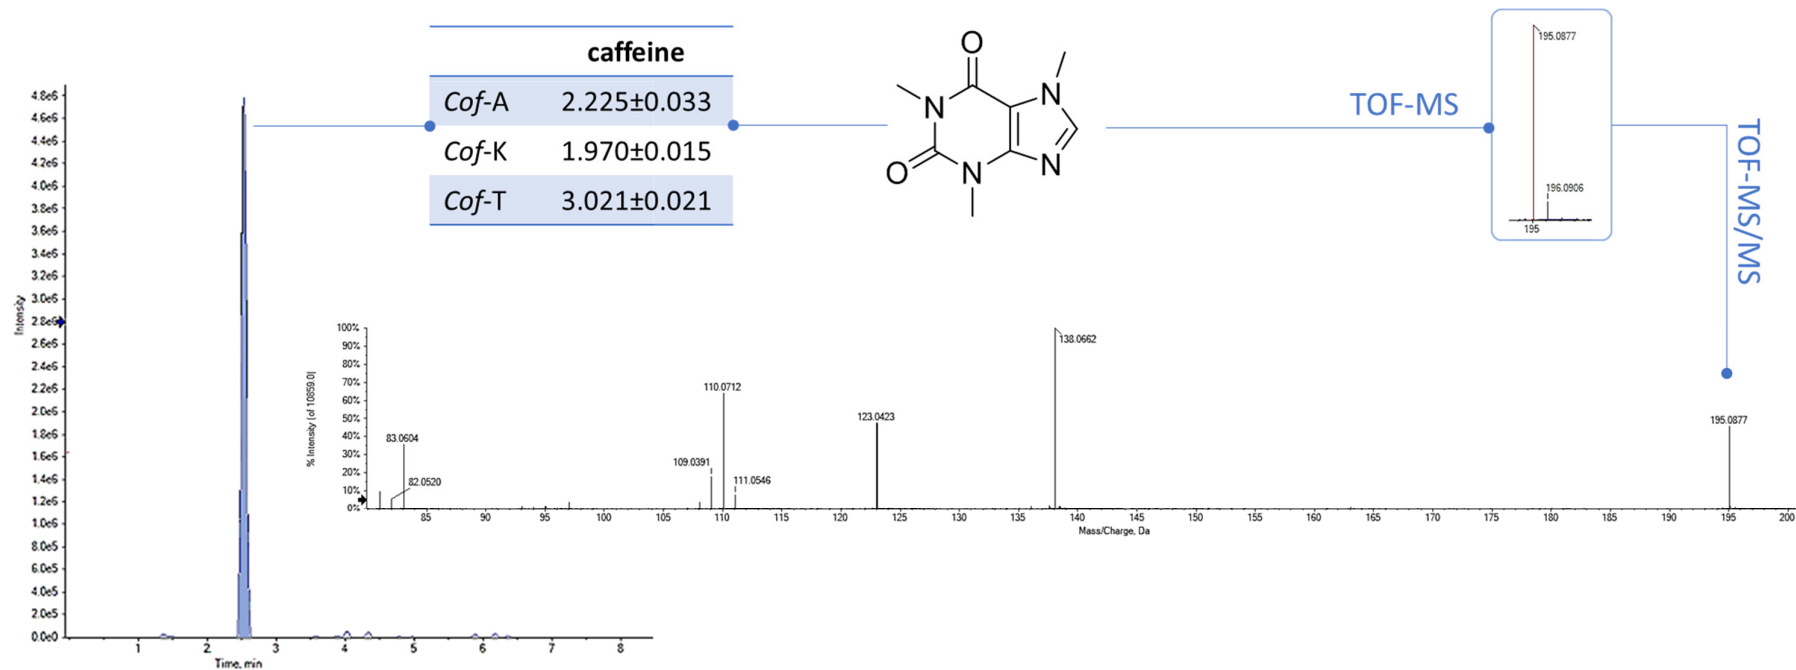

**Figure S1.** XIC, HR-MS and MS/MS of caffeine. In the table its amount is reported as wt % of dried moka coffee drinks (Cof-A = Coffee enriched with *C. sativa* cv. Antal shredded inflorescences; Cof-K = Coffee enriched with *C. sativa* cv. Kompolti shredded inflorescences; Cof-T = Coffee enriched with *C. sativa* cv. Tiborszallasi shredded inflorescences)

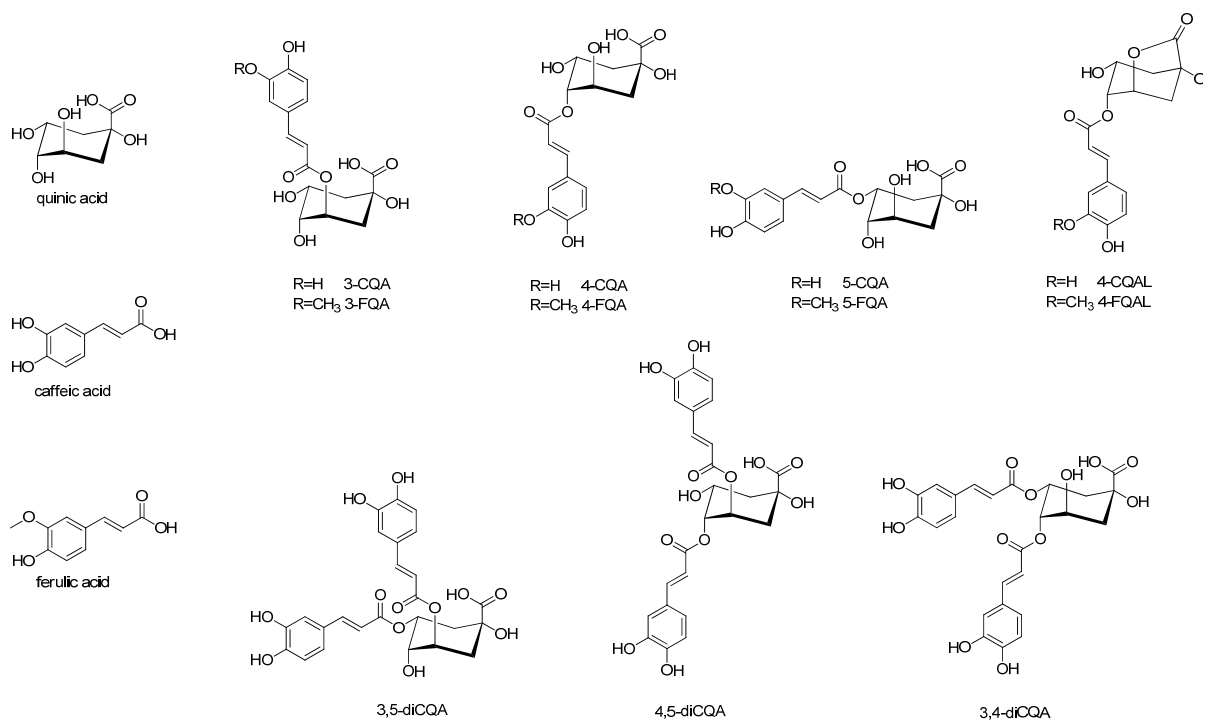

**Figure S2.** Chemical structures of the main chlorogenic acids (CQA = caffeoylquinic acid; diCQA = dicaffeoylquinic acid; CQAL = caffeoylquinic acid lactone; FQA = feruloylquinic acid; FQAL = feruloylquinic acid lactone).

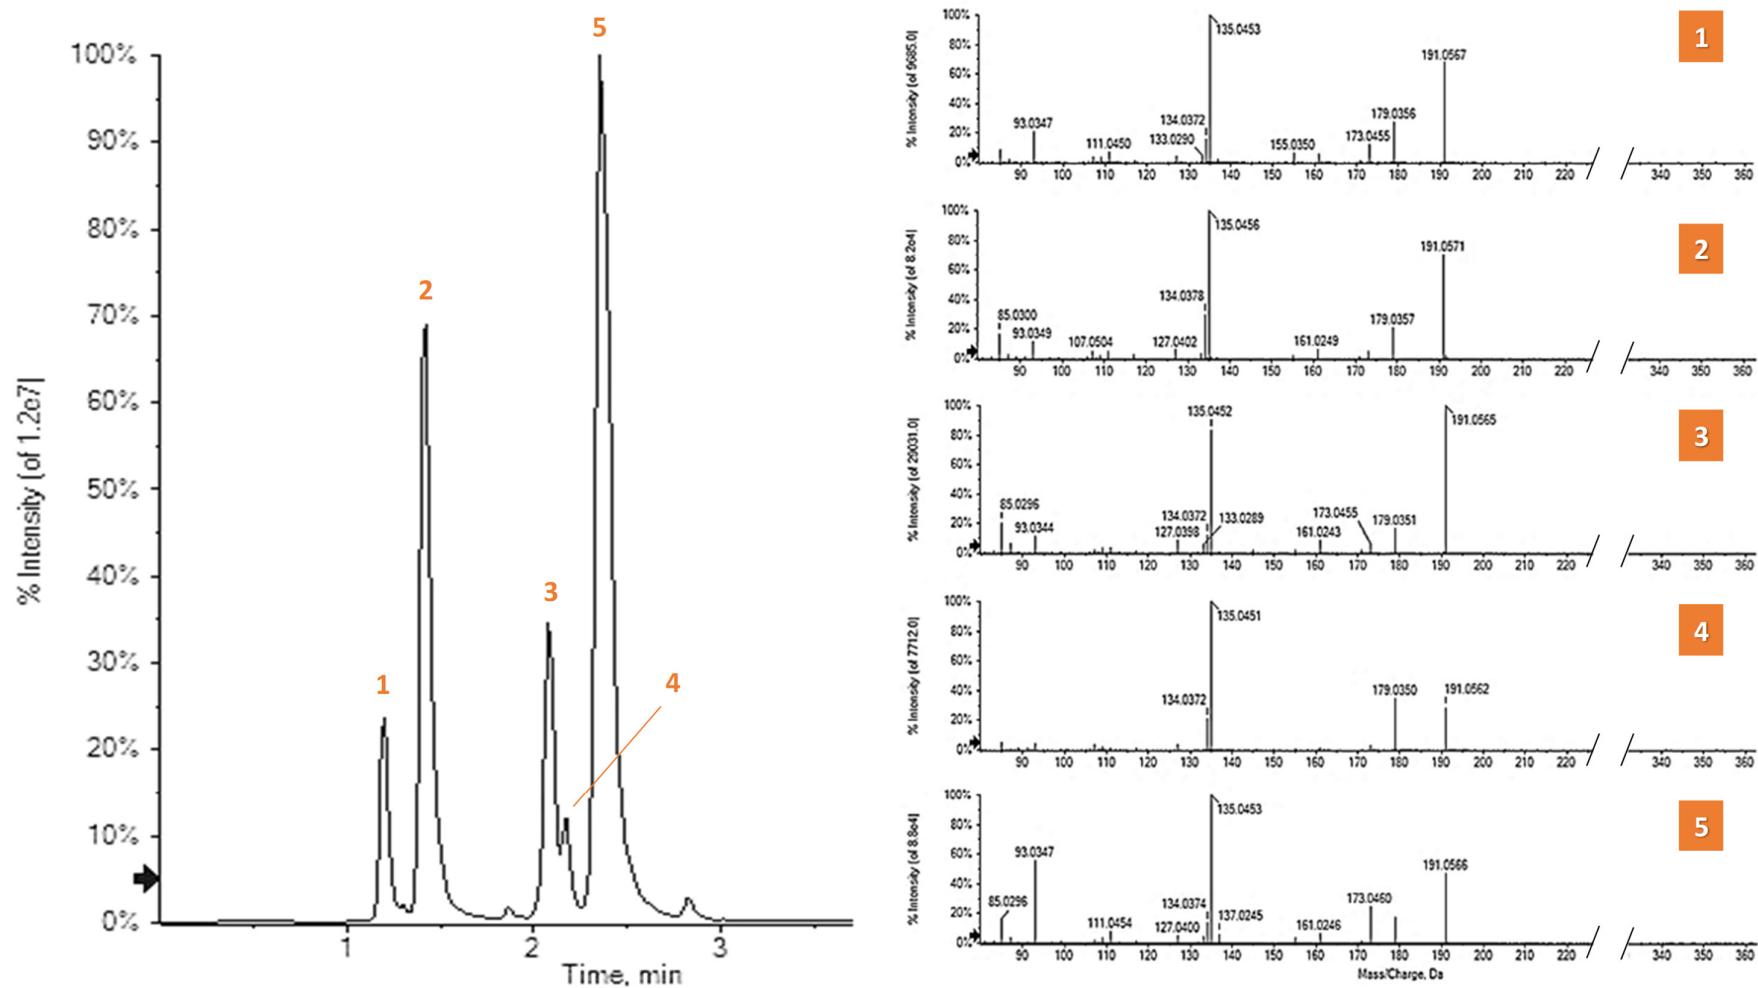

**Figure S3.** XIC (selecting the ion at  $m/z$  353.09±0.025) and HR-MS/MS of monocaffeoylquinic acids (CQAs) (*Cof-A* = Coffee enriched with *C. sativa* cv. Antal shredded inflorescences; *Cof-K* = Coffee enriched with *C. sativa* cv. Kompolti shredded inflorescences; *Cof-T* = Coffee enriched with *C. sativa* cv. Tiborszallasi shredded inflorescences).

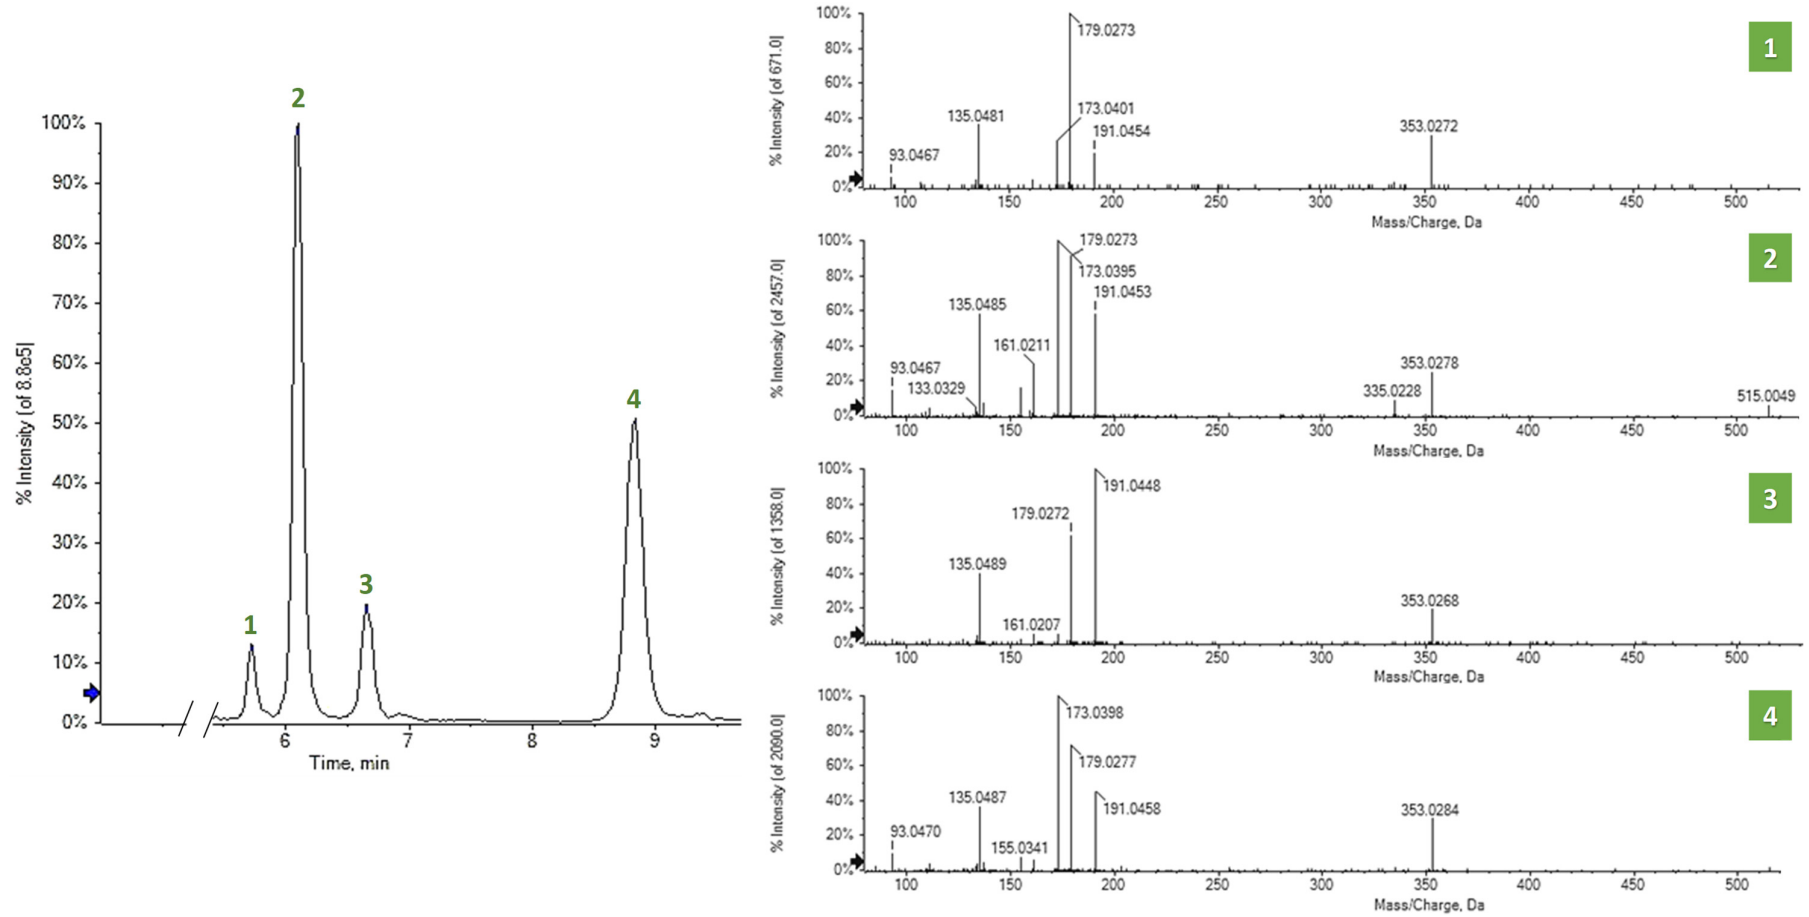

**Figure S4.** XIC (selecting the ion at  $m/z$  515.10 ± 0.025) and HR-MS/MS of di-caffeoylquinic acids (di-CQAs) (*Cof-A* = Coffee enriched with *C. sativa* cv. Antal shredded inflorescences; *Cof-K* = Coffee enriched with *C. sativa* cv. Kompolti shredded inflorescences; *Cof-T* = Coffee enriched with *C. sativa* cv. Tiborszallasi shredded inflorescences).

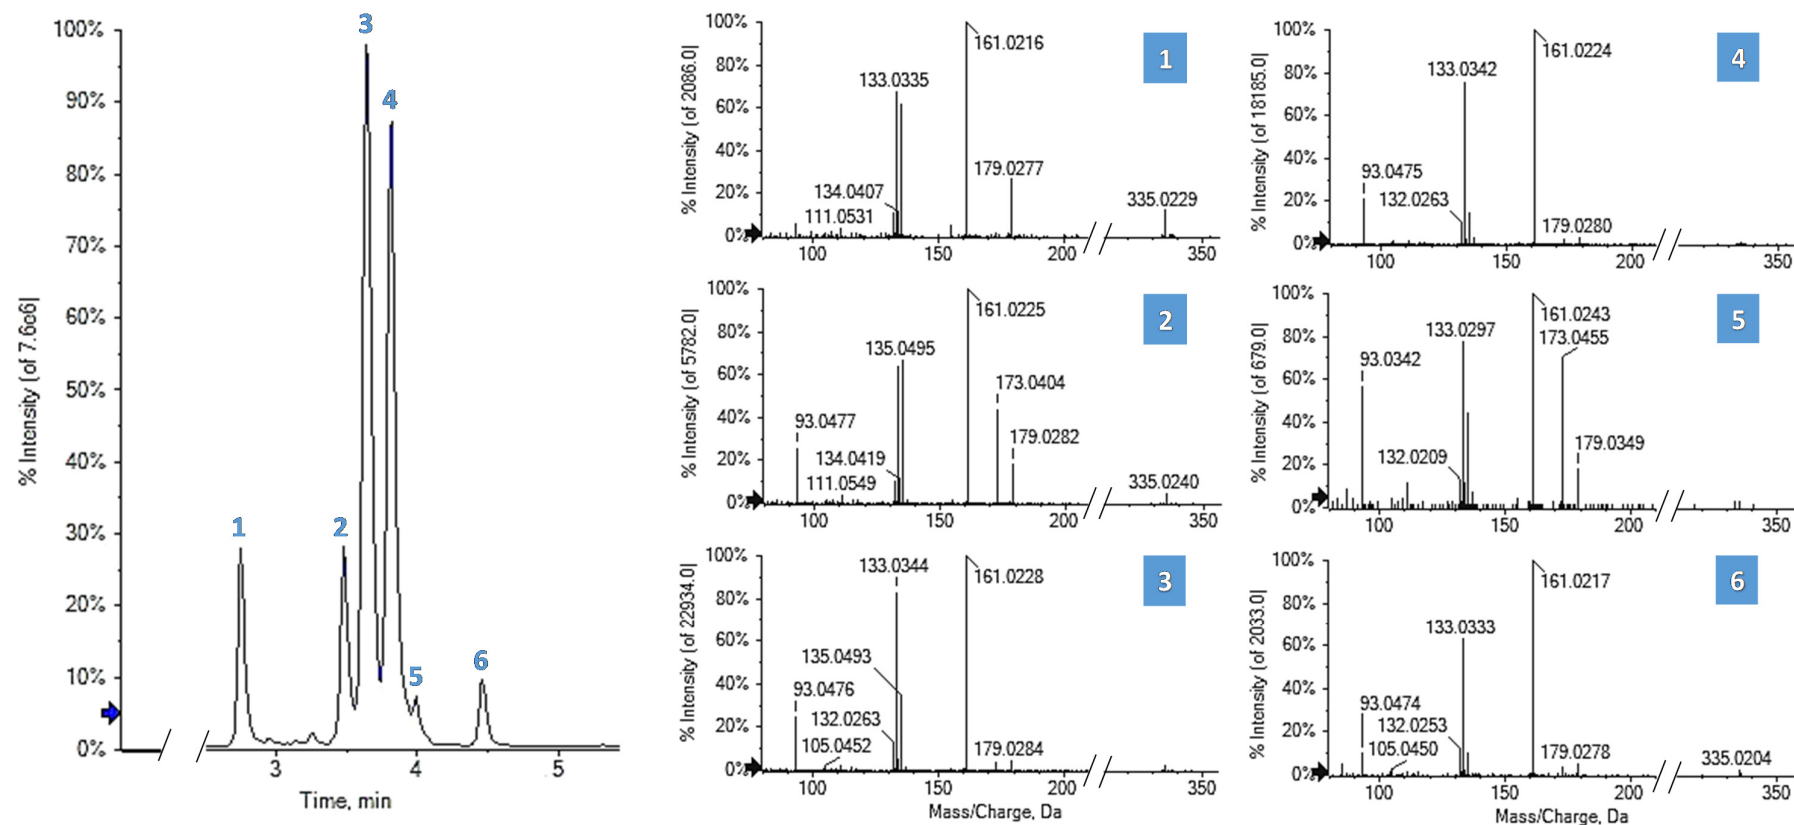

**Figure S5.** XIC (selecting the ion at  $m/z$  335.08±0.025) and HR-MS/MS of dehydrated derivatives of caffeoylquinic acids (CSAs/CQALs) (*Cof-A* = Coffee enriched with *C. sativa* cv. Antal shredded inflorescences; *Cof-K* = Coffee enriched with *C. sativa* cv. Kompolti shredded inflorescences; *Cof-T* = Coffee enriched with *C. sativa* cv. Tiborszallasi shredded inflorescences).

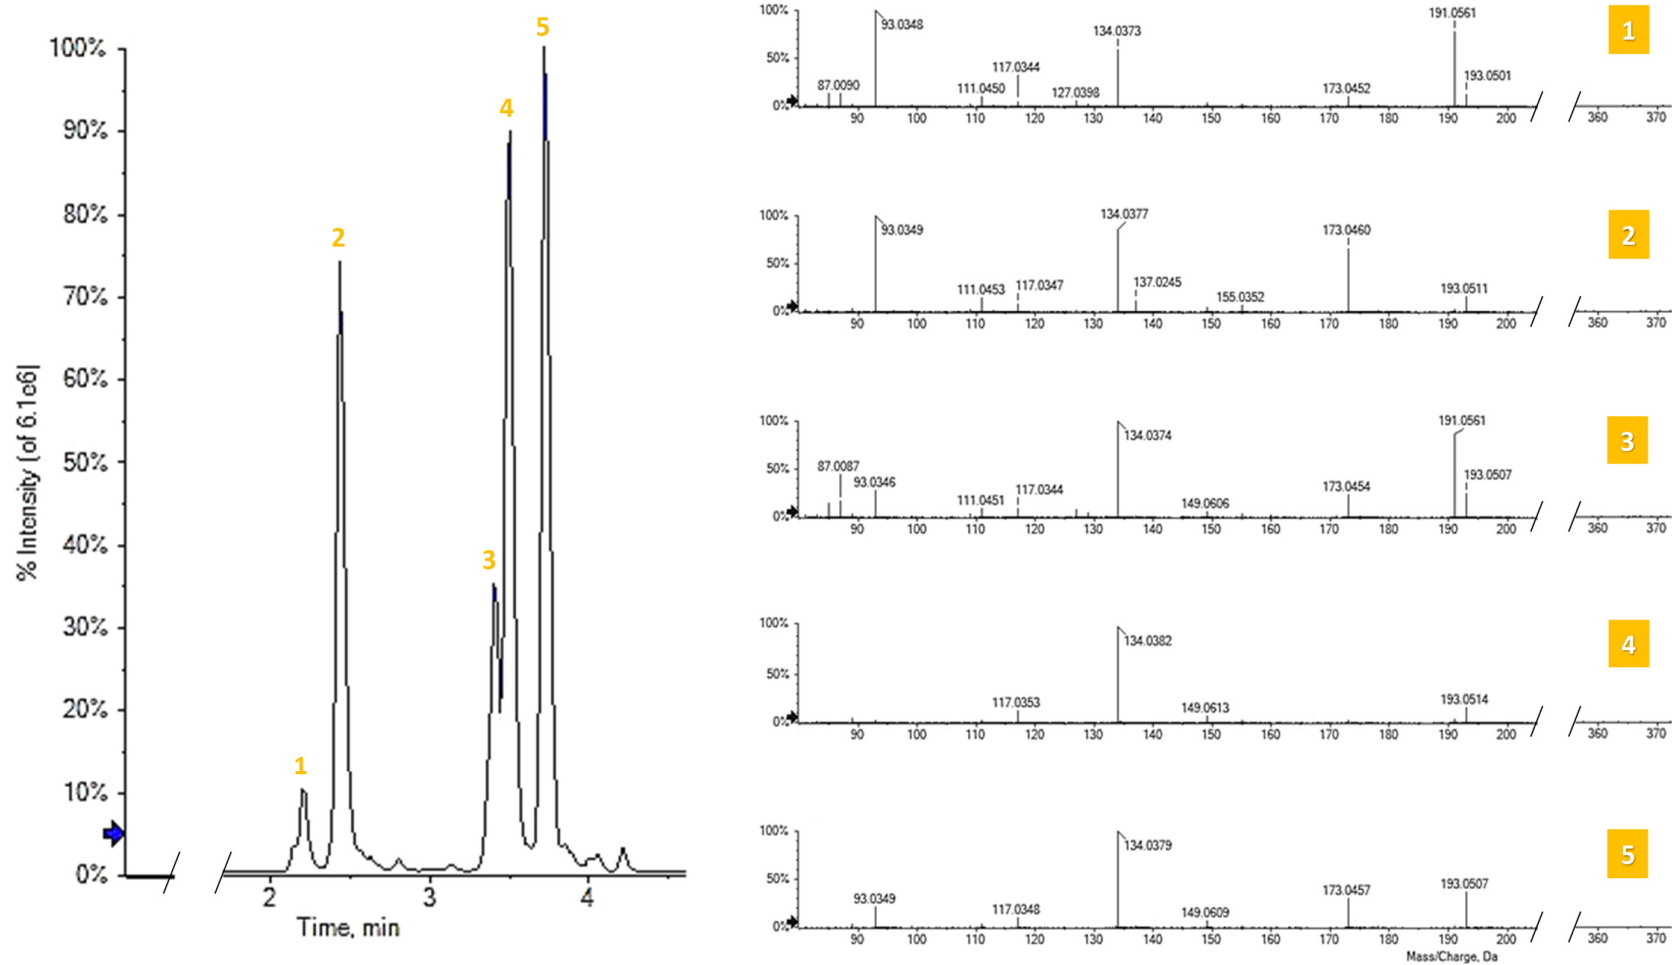

**Figure S6.** XIC (selecting the ion at  $m/z$  367.08±0.025) and HR-MS/MS of feruloylquinic acids (FQAs) (*Cof-A* = Coffee enriched with *C. sativa* cv. Antal shredded inflorescences; *Cof-K* = Coffee enriched with *C. sativa* cv. Kompolti shredded inflorescences; *Cof-T* = Coffee enriched with *C. sativa* cv. Tiborszallasi shredded inflorescences).
